# Supplementary material
Source: publisher figshare collection journal article supplement (https://geolsoc.figshare.com/ndownloader/files/5423264)
Supplement: Supplementary file 1 [file 5423264]

									Relative Isotopic Abundances										Derived Results																						Inverse Isochron Data
Lab ID#	Sample	Material	Locality	Watts	°C	Irrad.	J		40Ar		39Ar		38Ar		37Ar		36Ar		39Ar Mol	39Ar %	36Ar/39Ar	±1s	%(36Ar)Ca	37Ar/39Ar	±1s	Ca/K		38Ar/39Ar	±1s	40Ar/39Ar	±1s	40Ar*/39Ar		%40Ar*	Age (Ma)		w/±J		MSWD	Prob.	36Ar/40Ar		39Ar/40Ar		36Ar/39Ar
							( X 10-3) ± 1s		±1s		±1s		±1s		±1s		±1s		¥ 10-14	of total	( X 10-5)					±1s						±1s			±1s		±1s	±1s			±%1s		±%1s		Er. Corr.
20 second bar-raster
ST231
500416-41A	08 EK60	grndms		0.0	0	EK60251	0.038	0.001	0.8774	0.0730	0.0375	0.0133	0.0000	0.0066	0.0000	2.1053	0.0010	0.0010	0.000	0.335	2726.480	2798.300	0.000	0.0000	57.2976	0.0000000	112.3034000	0.0000000	0.1864642	23.3842800	8.6592510	12.8366700	10.3461300	55.8833900	0.8719594	0.70261430	0.70	0.00			0.00148	87.70	0.04353	36.61	0.0228
500416-42A	08 EK60	grndms		0.0	0	EK60251	0.038	0.001	77.5589	0.1787	0.0565	0.0125	0.0429	0.0073	0.9610	2.5268	0.2605	0.0019	0.000	0.505	461031.600	104176.200	0.097	17.0057	45.1545	33.3312000	88.5028400	0.7596051	0.2156317	1372.4550000	309.9812000	0.0000000	14.6793600	0.0000000	0.0000000	0.99747110	1.00	0.00			0.00336	1.06	0.00072	23.03	0.0211
500416-43A	08 EK60	grndms		0.0	0	EK60251	0.038	0.001	7.7004	0.0644	0.0000	0.0086	0.0076	0.0061	4.2113	2.0405	0.0216	0.0011	0.000	0.000	0.000	3820.760	5.152	0.0000	28.8243	0.0000000	56.4955200	0.0000000	0.0848421	0.0000000	12.6066100	0.0000000	5.3020090	20.6664700	0.0000000	0.36052120	0.36	0.00			0.00266	6.02	0.00000	0.00	0.0169
500416-44A	08 EK60	grndms		0.0	0	EK60251	0.038	0.001	43.9299	0.1471	0.0143	0.0090	0.0464	0.0056	1.2573	2.4904	0.1403	0.0016	0.000	0.127	983033.200	629239.100	0.237	88.0853	184.3890	172.6471000	361.4025000	3.2493200	2.1172900	3077.7760000	1969.8250000	159.1437000	120.6917000	4.8746960	10.7805700	8.15145400	8.15	0.00			0.00319	1.42	0.00031	68.96	0.0059
500416-45A	08 EK60	grndms		0.0	0	EK60251	0.038	0.001	114.9390	0.1960	0.0701	0.0130	0.0561	0.0130	1.9919	1.9998	0.3773	0.0059	0.000	0.626	538312.200	101762.300	0.139	28.4197	29.2033	55.7025600	57.2384200	0.8009402	0.2408932	1639.8730000	308.9475000	35.5334200	29.1227500	2.1268220	2.4126580	1.97606500	1.98	0.00			0.00328	1.73	0.00060	19.29	0.0148
500416-46A	08 EK60	grndms		0.0	0	EK60251	0.038	0.001	217.8382	0.2187	0.2341	0.0137	0.1392	0.0086	2.4955	1.9279	0.7339	0.0078	0.000	2.090	313538.700	18981.470	0.090	10.6616	8.3124	20.8967700	16.2922300	0.5944875	0.0512635	930.6960000	55.4891900	0.0000000	11.9002300	0.0000000	0.0000000	0.80868490	0.81	0.00			0.00337	1.26	0.00107	6.03	0.0612
500416-47A	08 EK60	grndms		0.0	0	EK60251	0.038	0.001	296.7621	0.2964	0.3826	0.0145	0.1877	0.0105	2.1274	1.9291	0.9882	0.0092	0.000	3.417	258263.500	10266.060	0.057	5.5602	5.0776	10.8979200	9.9521730	0.4905767	0.0335471	775.6216000	30.0037900	4.9963720	8.9176240	0.6418554	0.3394397	0.60578180	0.61	0.00			0.00333	1.15	0.00128	3.90	0.1023
500416-48A	08 EK60	grndms		0.0	0	EK60251	0.038	0.001	463.3219	0.6818	0.6930	0.0087	0.3069	0.0095	3.6942	1.6359	1.5127	0.0064	0.000	6.189	218275.100	2933.930	0.064	5.3304	2.3760	10.4476200	4.6569970	0.4427600	0.0149875	668.5347000	8.6456820	17.3278700	5.2881580	2.5829710	1.1769350	0.35906270	0.36	0.00			0.00326	0.80	0.00149	1.31	0.3834
500416-49A	08 EK60	grndms		0.0	0	EK60251	0.038	0.001	726.2864	1.4012	1.1427	0.0185	0.5140	0.0089	0.0000	1.8838	2.3949	0.0050	0.000	10.205	209584.600	3483.060	0.000	0.0000	1.6588	0.0000000	3.2513440	0.4498279	0.0108140	635.5985000	10.5996600	9.8235680	4.5549030	1.5460390	0.6673255	0.30936230	0.31	0.00			0.00330	0.72	0.00157	1.67	0.3638
500416-50A	08 EK60	grndms		0.0	0	EK60251	0.038	0.001	1220.8380	1.9009	2.2319	0.0163	1.0038	0.0177	6.1077	2.3128	4.0896	0.0180	0.000	19.932	183236.800	1588.600	0.039	2.7366	1.0429	5.3637060	2.0440910	0.4497555	0.0087401	547.0041000	4.2638250	0.1575286	4.4534000	0.0287477	0.0107030	0.30257830	0.30	0.00			0.00335	0.81	0.00182	0.78	0.5169
500416-51A	08 EK60	grndms		0.0	0	EK60251	0.038	0.001	1105.1510	0.9050	2.2827	0.0269	0.6705	0.0441	4.1314	2.7271	3.6469	0.0160	0.000	20.386	159762.400	2043.820	0.030	1.8099	1.2023	3.5473080	2.3564530	0.2937379	0.0198625	484.1400000	5.8798590	7.2923810	3.8357530	1.5045090	0.4954029	0.26054350	0.26	0.00			0.00330	0.80	0.00206	1.22	0.3910
500416-52A	08 EK60	grndms		0.0	0	EK60251	0.038	0.001	752.6526	1.4032	1.9244	0.0399	0.5083	0.0315	8.0978	2.4989	2.4615	0.0130	0.000	17.186	127914.200	2788.900	0.087	4.2081	1.3096	8.2478720	2.5668680	0.2641575	0.0174934	391.1214000	8.3285790	9.5722030	3.3560730	2.4407330	0.6502531	0.22794170	0.23	0.00			0.00327	0.87	0.00255	2.14	0.2465
500416-53A	08 EK60	grndms		0.0	0	EK60251	0.038	0.001	940.4881	1.0084	2.1277	0.0292	0.5664	0.0382	0.5103	2.7807	3.1098	0.0150	0.000	19.002	146154.500	2164.770	0.004	0.2399	1.3150	0.4701104	2.5773400	0.2662006	0.0185597	442.0156000	6.2461320	5.6639420	3.6266980	1.2812140	0.3847877	0.24635850	0.25	0.00			0.00331	0.83	0.00226	1.42	0.3435
